# Supplementary figures and images for: Oxidative Stress Posttranslationally Regulates the Expression of Ha-Ras and Ki-Ras in Cultured Astrocytes
Source: Hindawi journal article supplement (doi:10.1155/2012/792705), 2012-01-01

Fig. S1

**A**

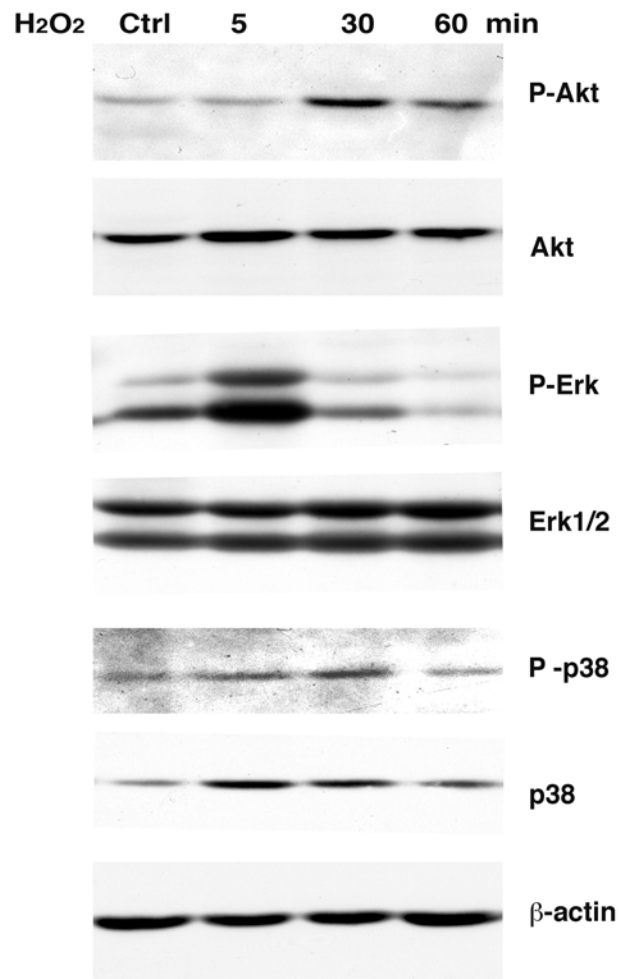

**B**

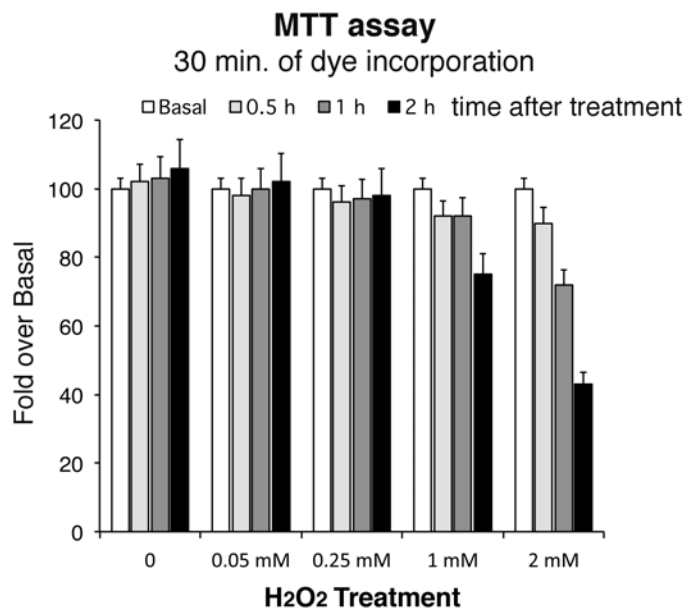

Supplement: f1 [file 792705.f1.pdf]
